# Supplementary material for: SIRT3-IDH2 axis is a target of dietary fructose: implication of IDH2 as a key player in dietary carcinogen toxicity in mice colon
Source: Research Square preprint supplement (doi:10.21203/rs.3.rs-6226269/v1), 2025-04-22
Supplement: Supplementary file 1 [file 45a144dbde0295bb6fed7542.pdf]

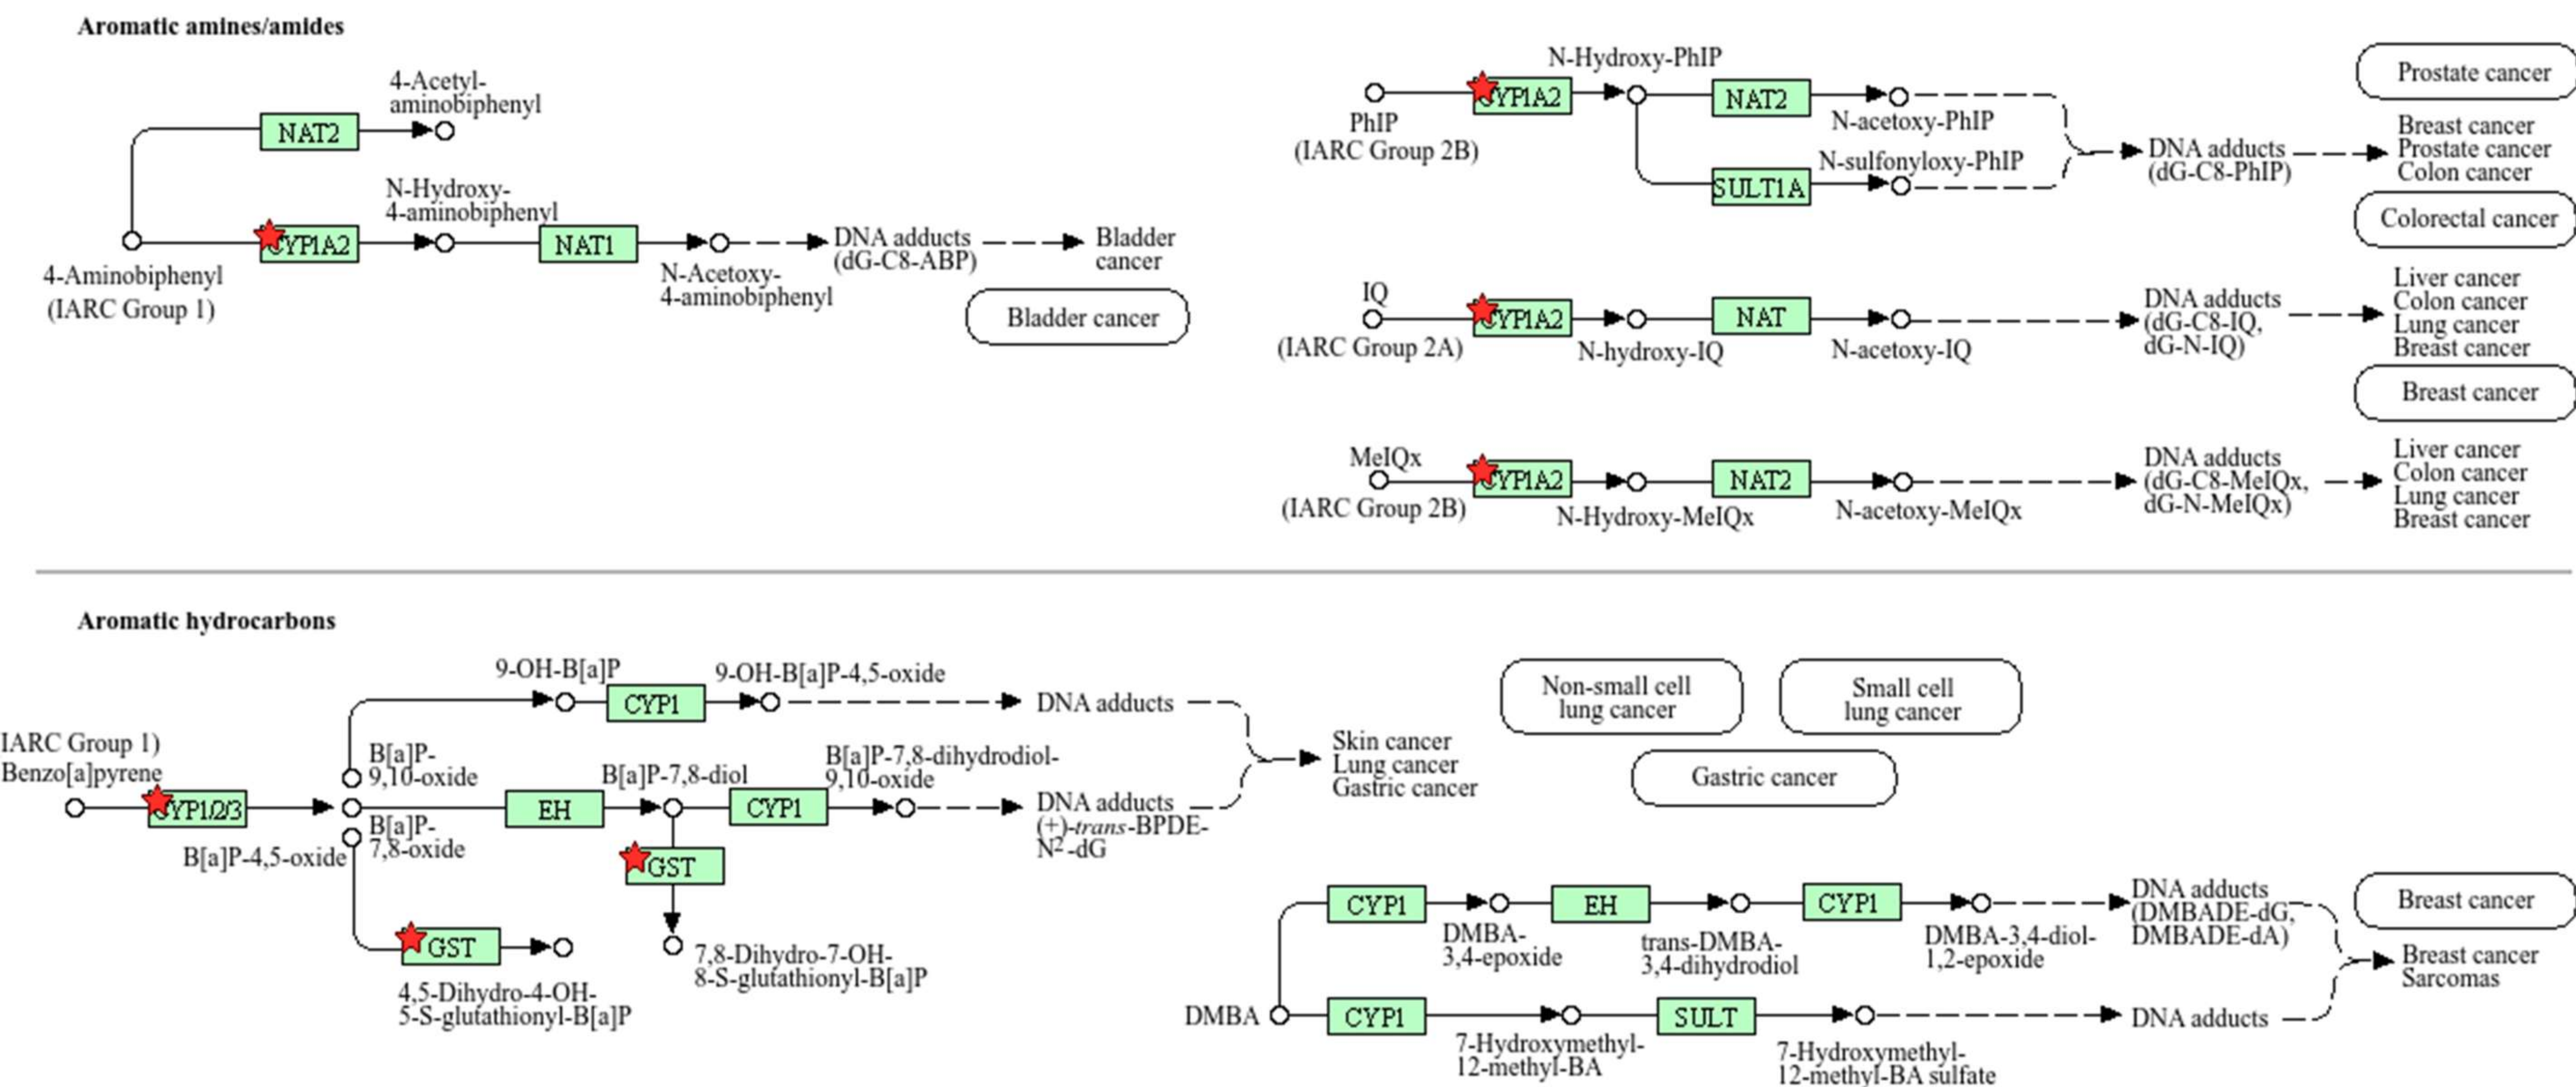

**Figure S1. Kyoto Encyclopedia of Genes and Genomes (KEGG) pathway: Chemical Carcinogenesis – DNA adducts.**

A KEGG pathway ‘Chemical Carcinogenesis – DNA adduct’ enriched liver tissues from mice fed fructose water, which was retrieved from transcriptome for KEGG pathway terms.

Abbreviations: KEGG, Kyoto Encyclopedia of Genes and Genomes



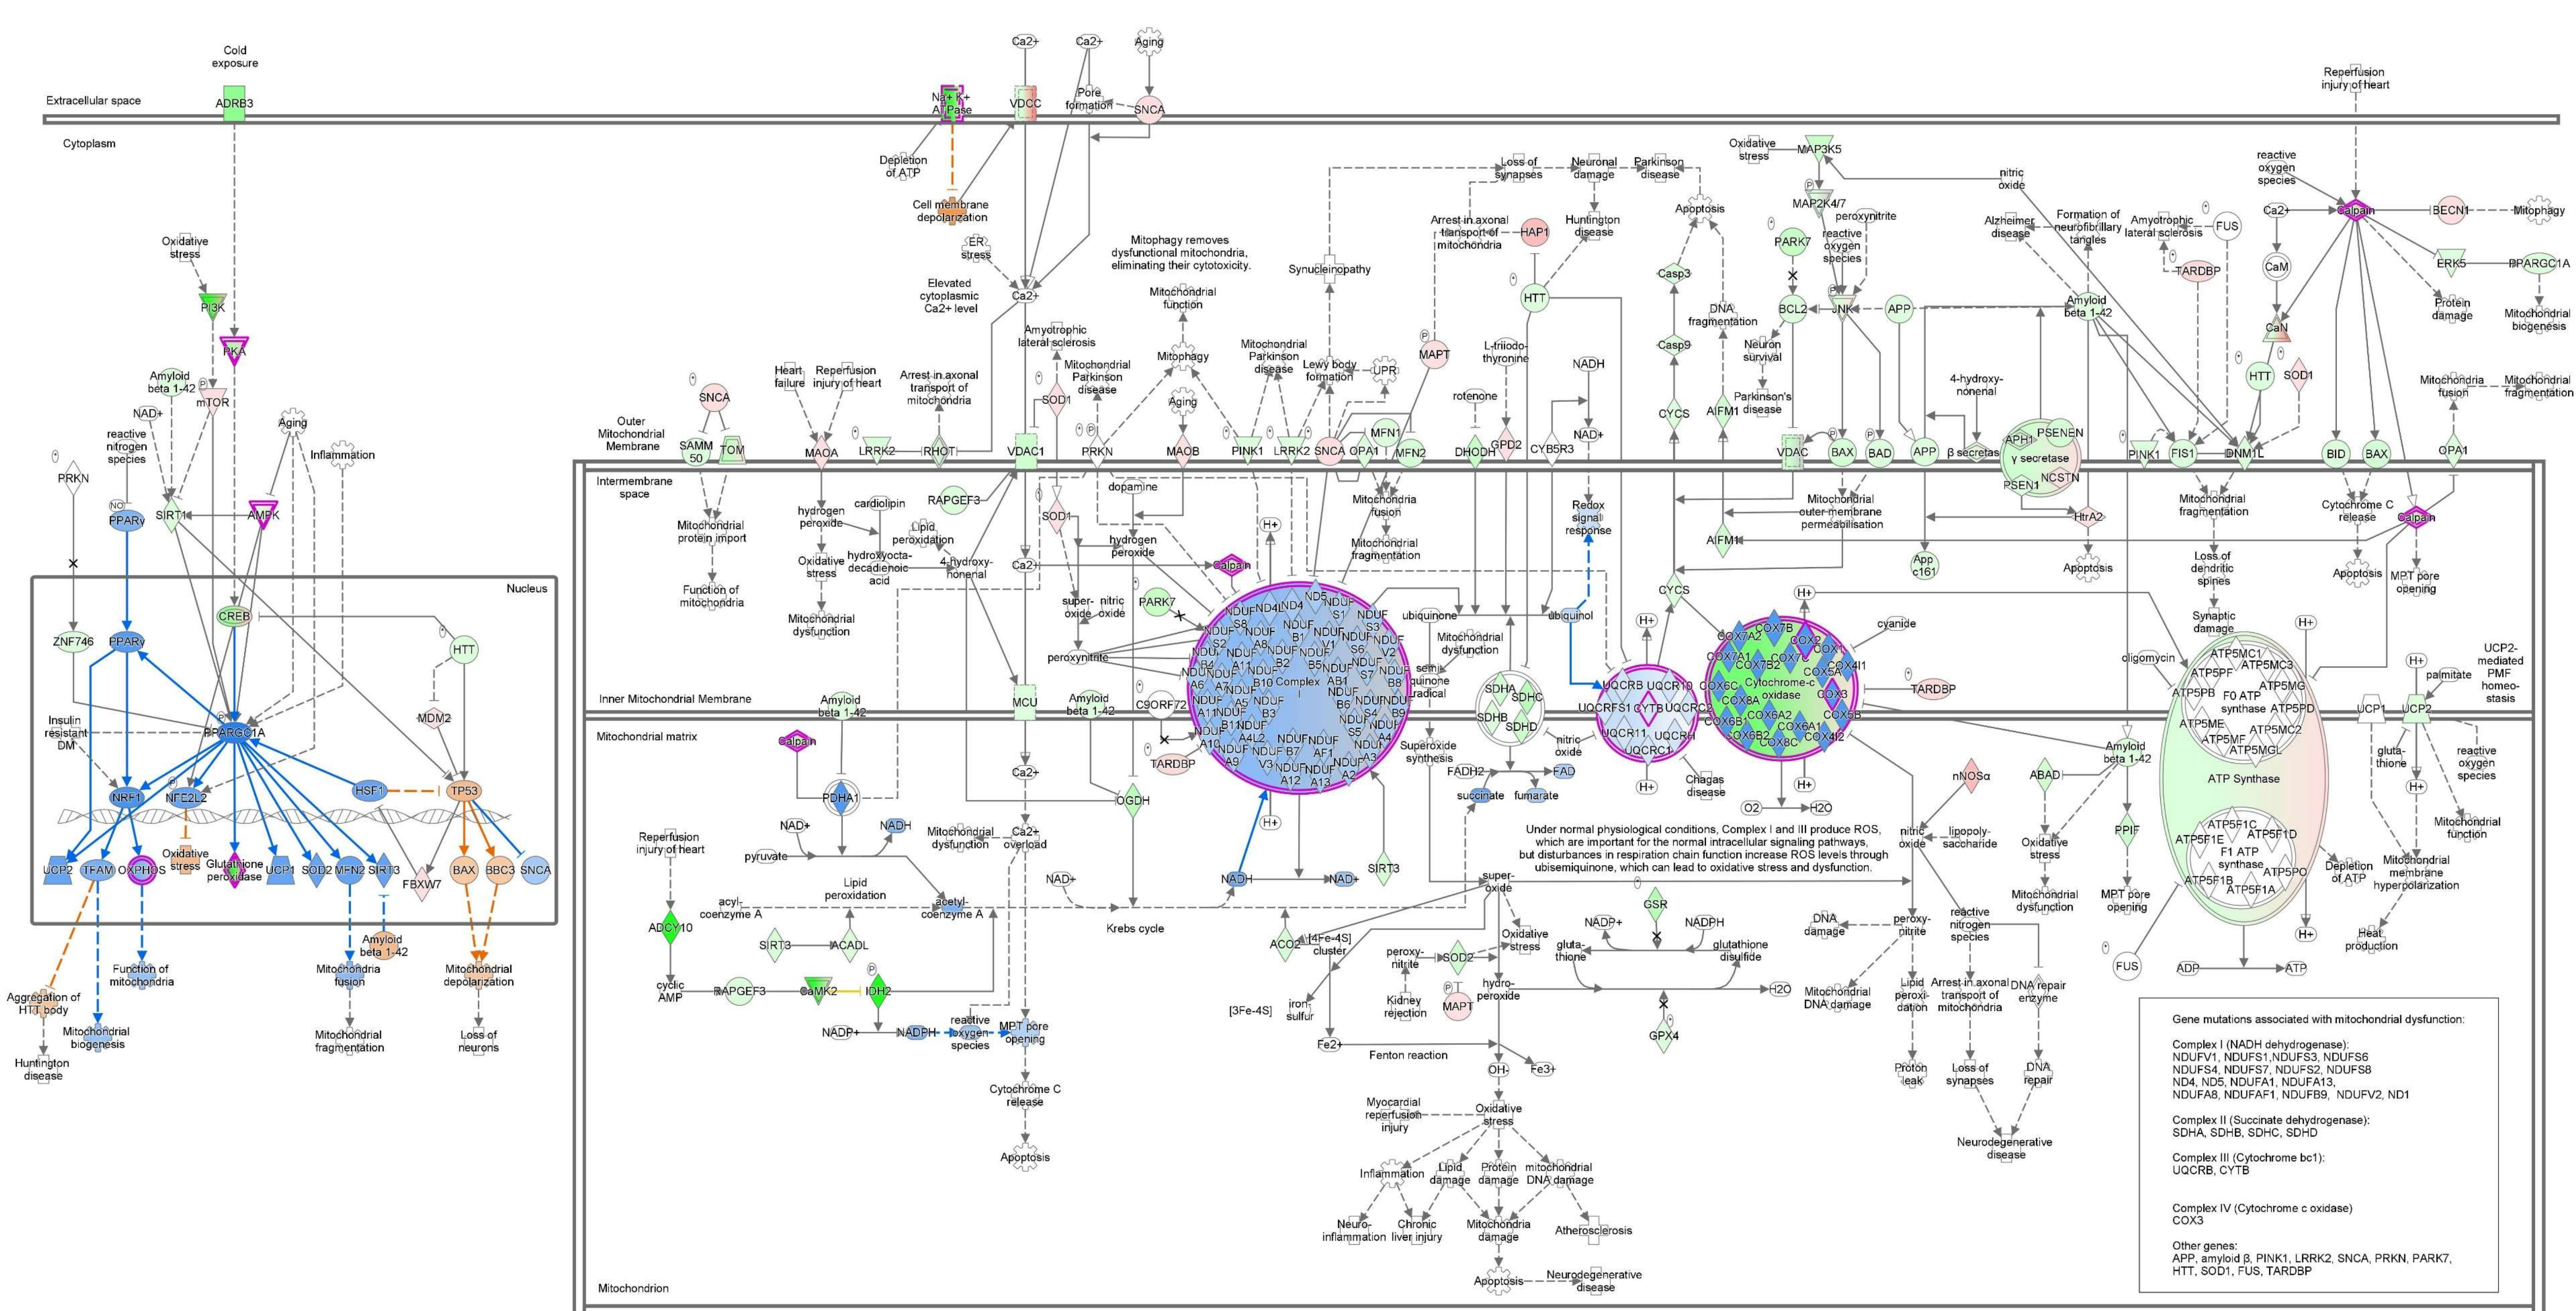

**Figure S2. Canonical Pathway: Mitochondrial dysfunction.** Colonic transcriptomics suggests that IDH2 KO-induced mitochondrial dysfunction is linked to the suppression of Complex IV and V in comparison to WT mice. Blue/red indicate observed inhibition/activation, while green/orange represent predicted inhibition/activation. Abbreviations: IDH2, isocitrate dehydrogenase 2; KO, knockout; WT, wild type











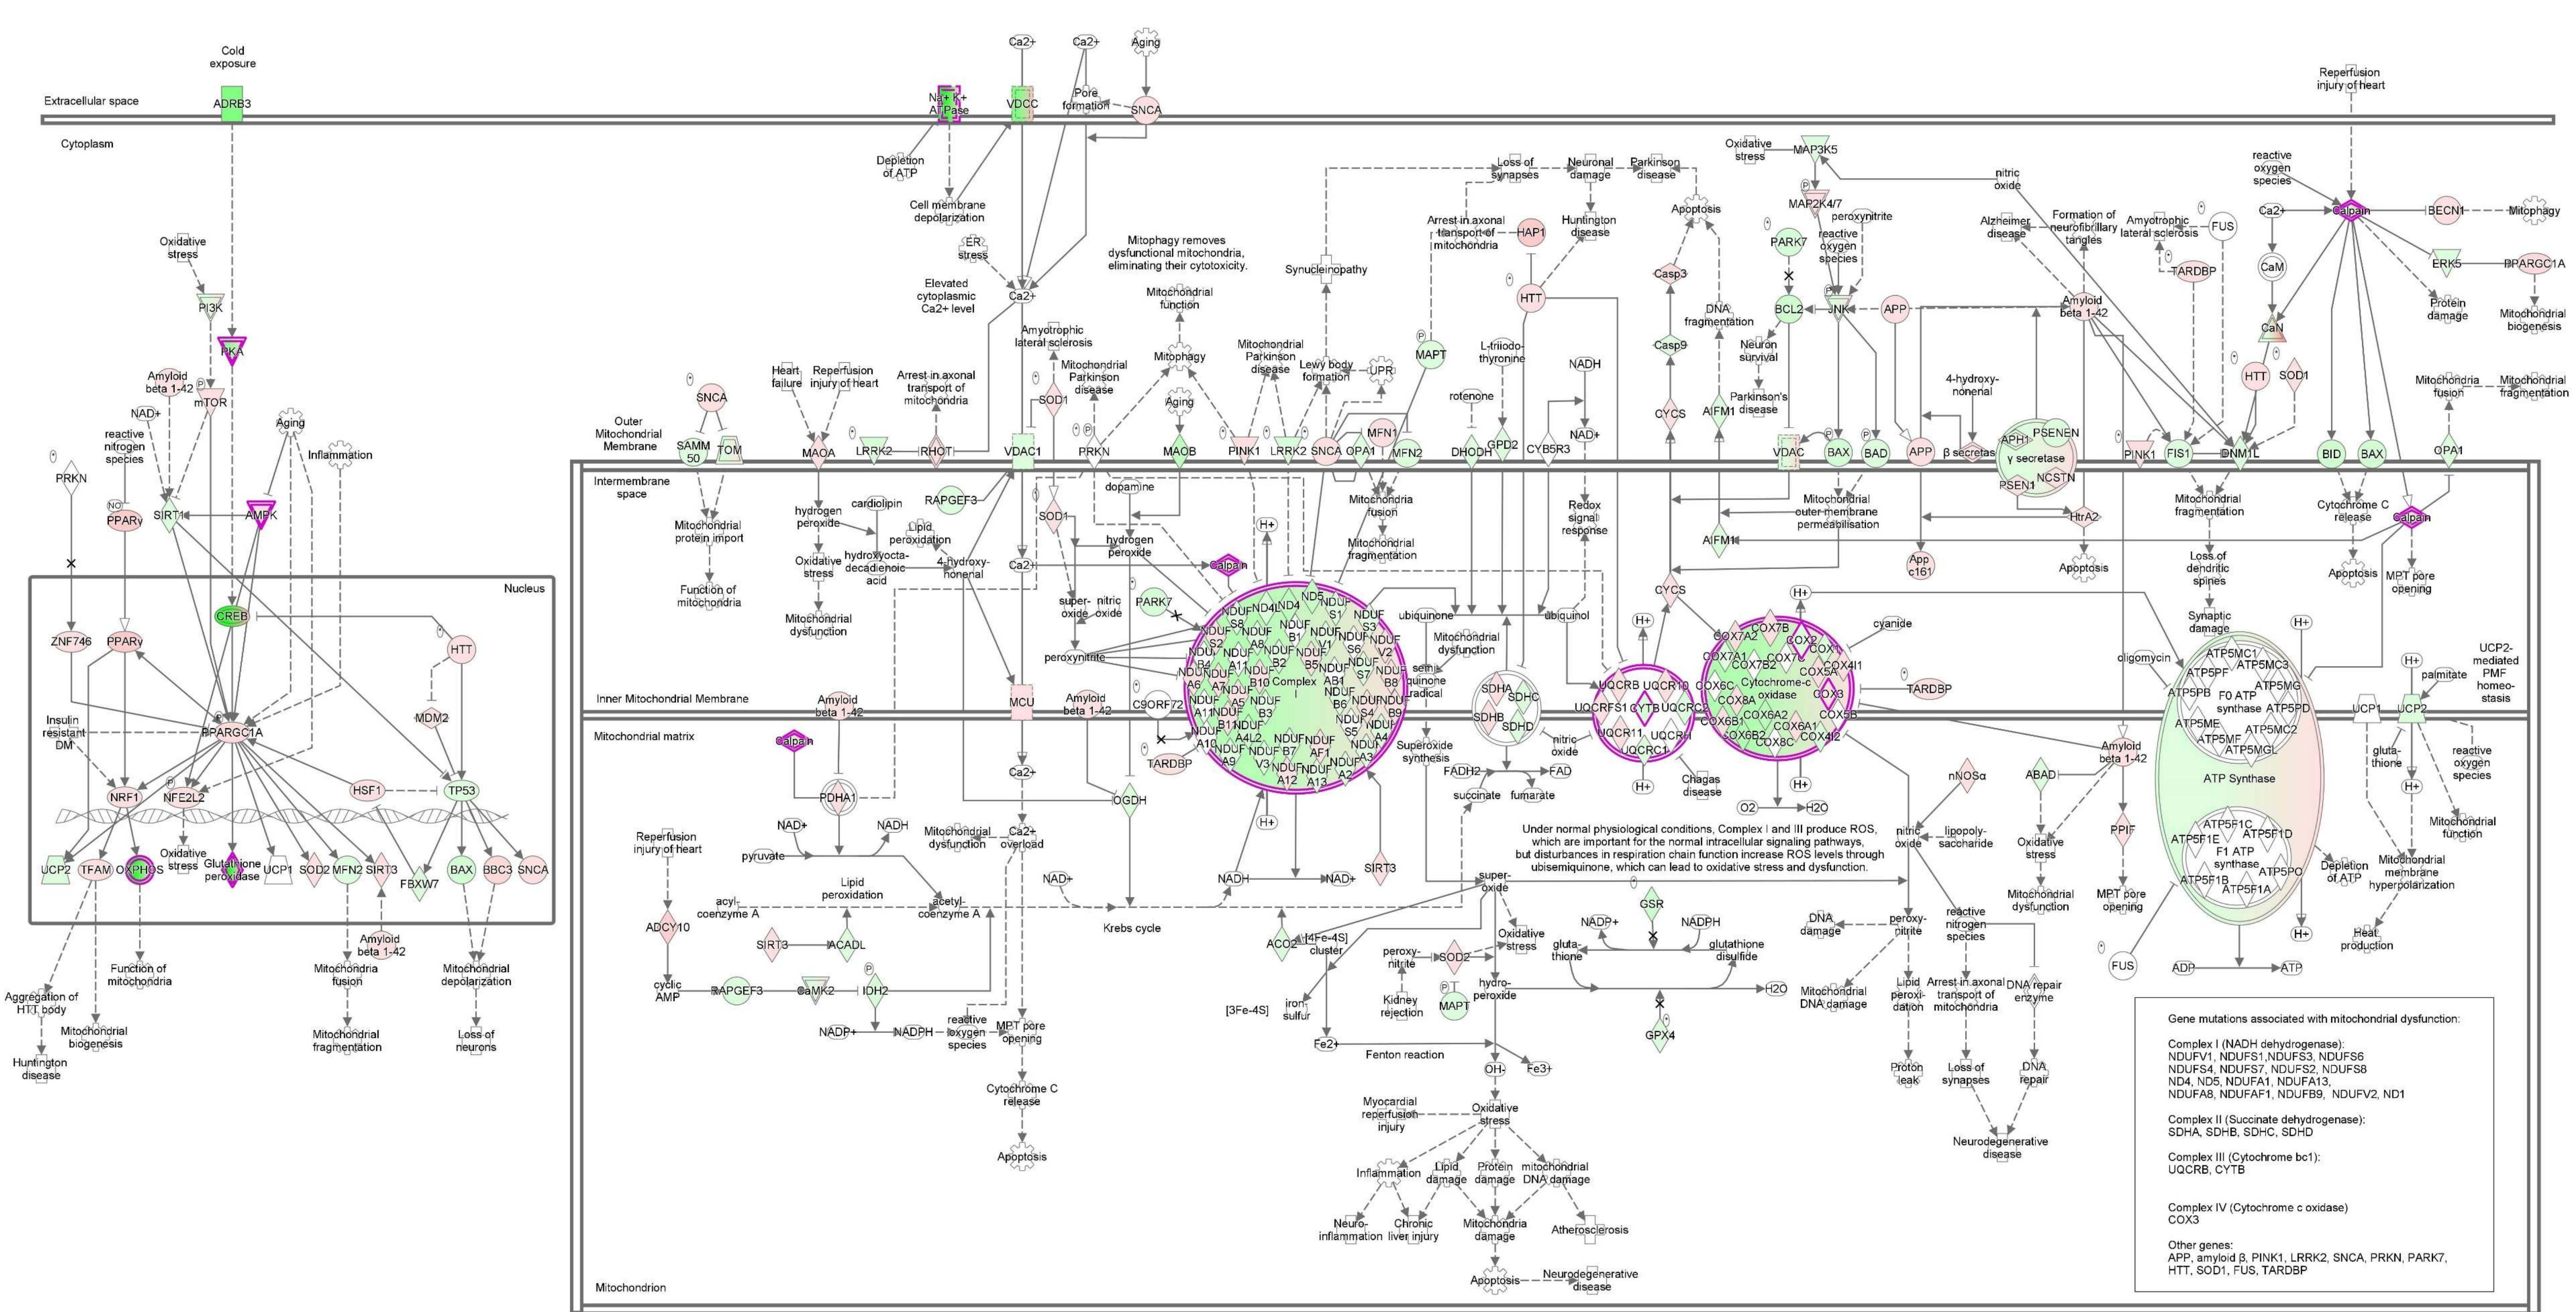



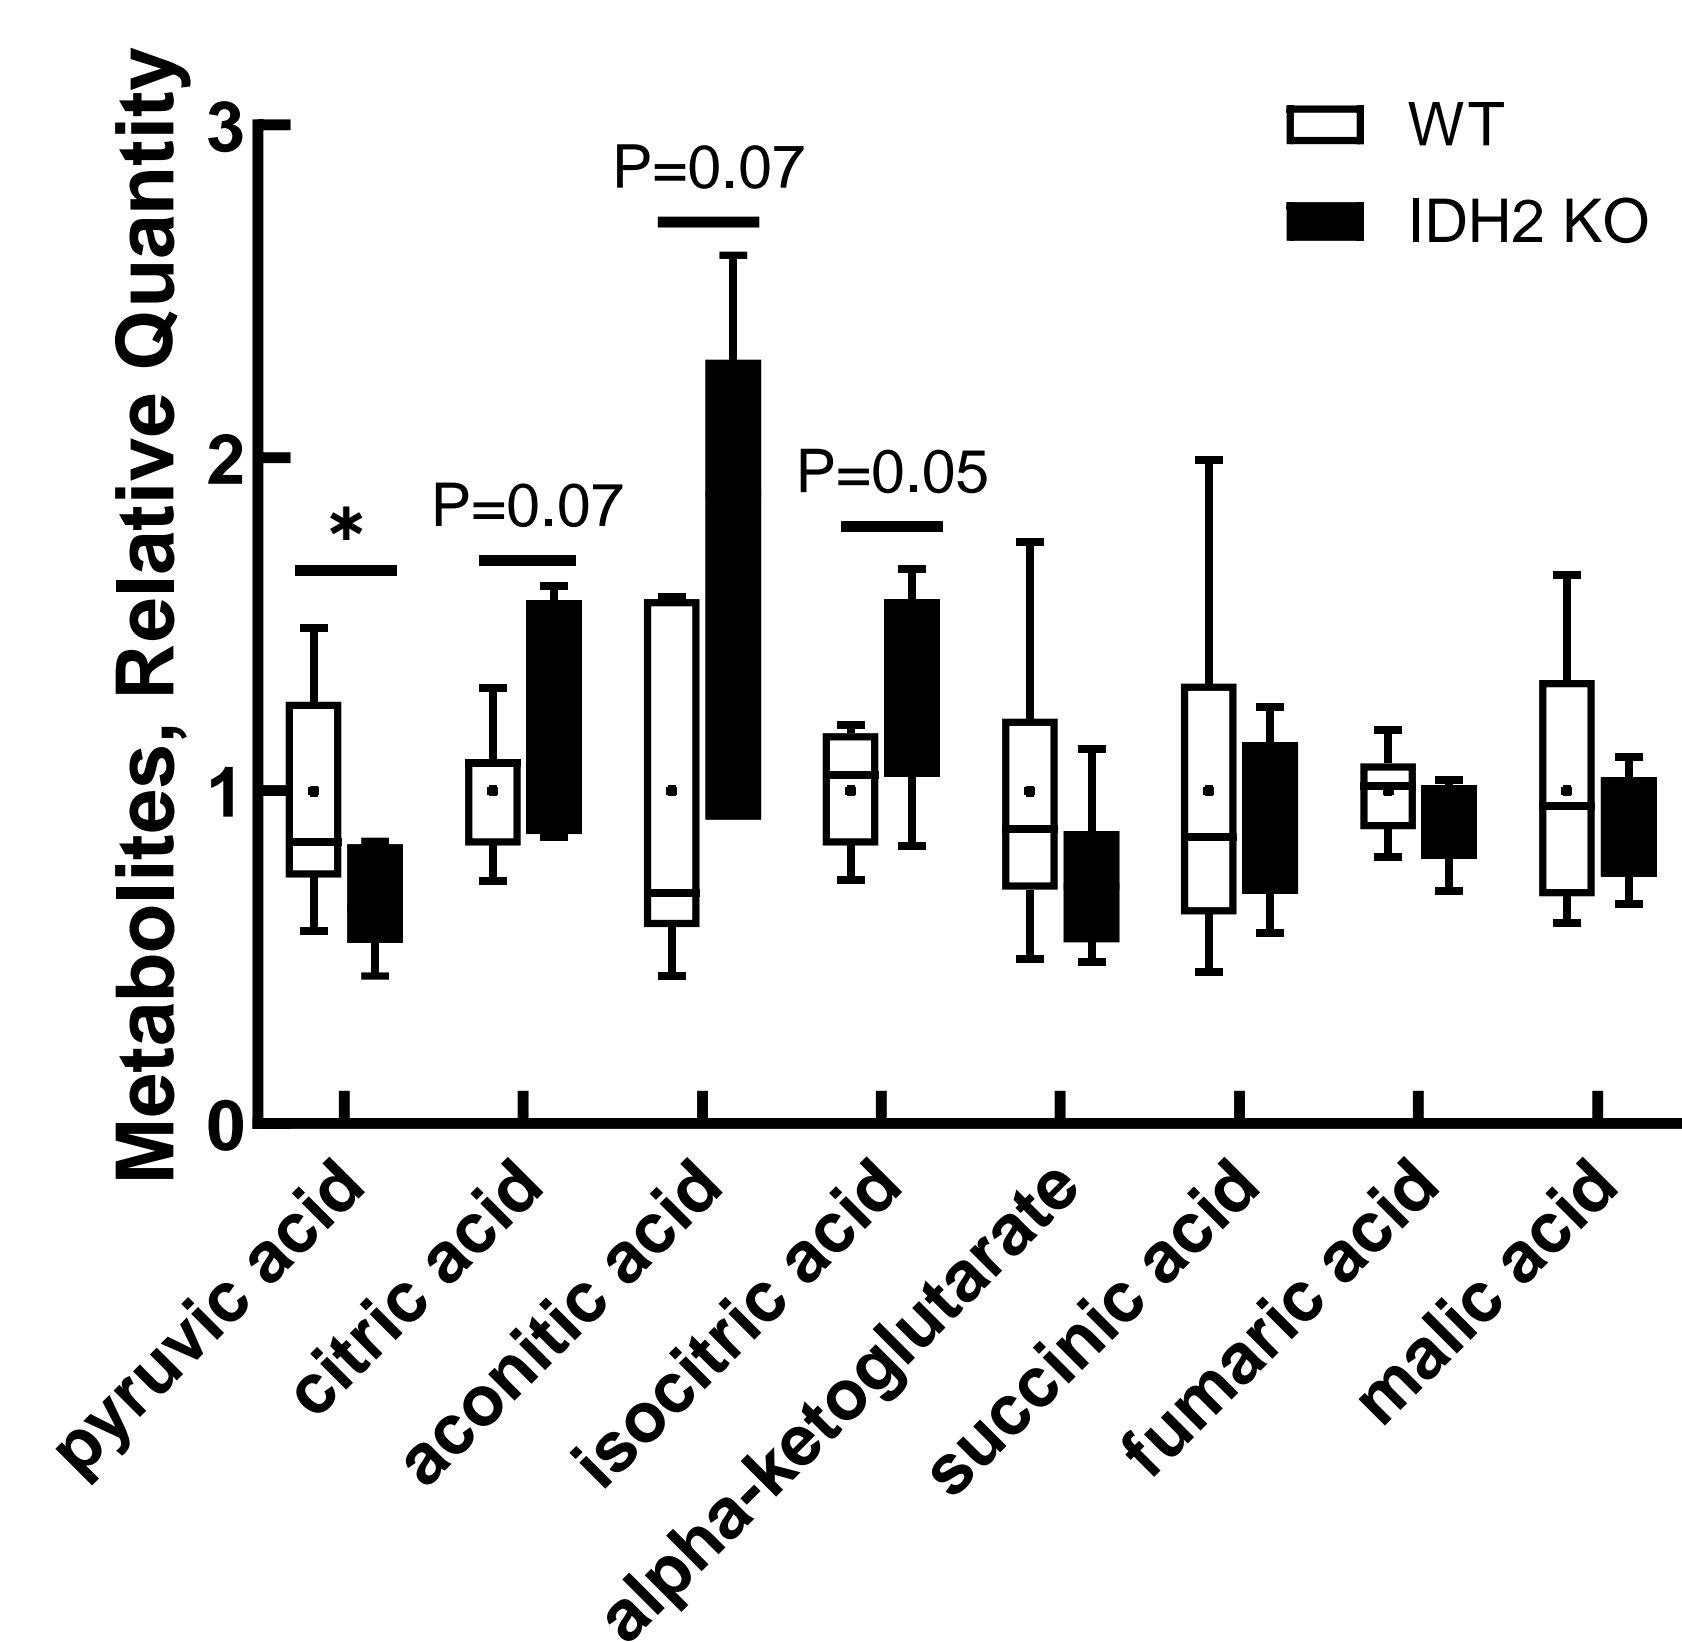

**Figure S6. Plasma metabolomics revealed that isocitrate dehydrogenase 2 (IDH2) knockout (KO) may induce reductive TCA cycle.**

Key metabolites of the TCA cycle in plasma of mice to validate IDH2 KO-mediated metabolic shift. Data are present as mean  $\pm$  standard error of the mean (n=6 per group). A p-value of 0.05 or less was considered statistically significant; \*p<0.05.

Abbreviations: IDH2, isocitrate dehydrogenase 2; KO, knockout; WT, wild type

**Table S1. Activated or inhibited canonical pathways<sup>1</sup> in colon tissues by IDH2 knockout**

| Canonical Pathways                                                         | -log(p-value) | z-score <sup>2</sup> |
|----------------------------------------------------------------------------|---------------|----------------------|
| Interferon alpha/beta signaling                                            | 10.7          | 3.606                |
| Role of Hypercytokinemia/hyperchemokinema in the Pathogenesis of Influenza | 8.53          | 2.887                |
| ISGylation Signaling Pathway                                               | 5.52          | 2.53                 |
| Pathogen Induced Cytokine Storm Signaling Pathway                          | 2.61          | 2.496                |
| DDX58/IFIH1-mediated induction of interferon-alpha/beta                    | 2.29          | 2.236                |
| Activation of IRF by Cytosolic Pattern Recognition Receptors               | 5.45          | 2.121                |
| Neuroinflammation Signaling Pathway                                        | 3.76          | 2.111                |
| Interferon Signaling                                                       | 3.85          | 2                    |
| Antigen Presentation Pathway                                               | 2.67          | 2                    |
| SPINK1 Pancreatic Cancer Pathway                                           | 2             | 2                    |
| Immunogenic Cell Death Signaling Pathway                                   | 1.42          | 2                    |
| Death Receptor Signaling                                                   | 1.33          | 2                    |
| Glucose metabolism                                                         | 1.58          | -2                   |
| Coronavirus Pathogenesis Pathway                                           | 2.07          | -2.121               |
| The citric acid (TCA) cycle and respiratory electron transport             | 2.98          | -2.236               |
| O-linked glycosylation                                                     | 1.69          | -2.236               |
| Ion channel transport                                                      | 2.93          | -2.333               |
| Gap Junction Signaling                                                     | 1.39          | -2.333               |
| Serotonin Receptor Signaling                                               | 2.55          | -2.84                |

<sup>1</sup>Activity states were predicted by the IPA software using differentially expressed genes.

<sup>2</sup>Calculated activity score. Positive and negative values indicate predicted activated and predicted inhibited, respectively.
