# Supplementary material for: SIRT3-IDH2 axis is a target of dietary fructose: implication of IDH2 as a key player in dietary carcinogen toxicity in mice colon
Source: Research Square preprint supplement (doi:10.21203/rs.3.rs-6226269/v1), 2025-04-22
Supplement: Supplementary file 1 [file e43243477df0ac3965dd0cba.docx]

**Table S1. Activated or inhibited canonical pathways1 in colon tissues by IDH2 knockout**

| Canonical Pathways | -log(p-value) | z-score2 |
| --- | --- | --- |
| Interferon alpha/beta signaling | 10.7 | 3.606 |
| Role of Hypercytokinemia/hyperchemokinemia in the Pathogenesis of Influenza | 8.53 | 2.887 |
| ISGylation Signaling Pathway | 5.52 | 2.53 |
| Pathogen Induced Cytokine Storm Signaling Pathway | 2.61 | 2.496 |
| DDX58/IFIH1-mediated induction of interferon-alpha/beta | 2.29 | 2.236 |
| Activation of IRF by Cytosolic Pattern Recognition Receptors | 5.45 | 2.121 |
| Neuroinflammation Signaling Pathway | 3.76 | 2.111 |
| Interferon Signaling | 3.85 | 2 |
| Antigen Presentation Pathway | 2.67 | 2 |
| SPINK1 Pancreatic Cancer Pathway | 2 | 2 |
| Immunogenic Cell Death Signaling Pathway | 1.42 | 2 |
| Death Receptor Signaling | 1.33 | 2 |
| Glucose metabolism | 1.58 | -2 |
| Coronavirus Pathogenesis Pathway | 2.07 | -2.121 |
| The citric acid (TCA) cycle and respiratory electron transport | 2.98 | -2.236 |
| O-linked glycosylation | 1.69 | -2.236 |
| Ion channel transport | 2.93 | -2.333 |
| Gap Junction Signaling | 1.39 | -2.333 |
| Serotonin Receptor Signaling | 2.55 | -2.84 |

1Activity states were predicted by the IPA software using differentially expressed genes.

2Calculated activity score. Positive and negative values indicate predicted activated and predicted inhibited, respectively.
